# Supplementary material for: Human exposure to per- and polyfluoroalkyl substances and other emerging contaminants in drinking water
Source: Springer Nature journal article supplement (doi:10.1038/s41545-023-00236-y), 2023-03-02
Supplement: MOESM1 [file 41545_2023_236_MOESM1_ESM.pdf]

## Supplementary Information

Human exposure to per- and polyfluoroalkyl substances and other emerging contaminants in drinking water

*Dora Cserbik,<sup>†,1,2,3,7</sup> Paula E. Redondo-Hasselerharm,<sup>†,1,2,3</sup> Maria J. Farré,<sup>5,6</sup> Josep Sanchís,<sup>5,6</sup>  
Arantxa Bartolomé,<sup>4</sup> Alexandra Paraian,<sup>4</sup> Eva María Herrera,<sup>4</sup> Josep Caixach,<sup>4</sup> Cristina M.  
Villanueva,<sup>††,1,2,3,7\*</sup> Cintia Flores.<sup>††,4</sup>*

<sup>1</sup> ISGlobal, Barcelona, Spain

<sup>2</sup> Universitat Pompeu Fabra (UPF), Barcelona, Spain

<sup>3</sup> CIBER Epidemiología y Salud Pública (CIBERESP), Madrid, Spain

<sup>4</sup> Mass Spectrometry Laboratory/Organic Pollutants, Institute of Environmental Assessment and Water Research, IDAEA-CSIC, Barcelona, Spain

<sup>5</sup> Catalan Institute for Water Research, ICRA, Girona, Spain

<sup>6</sup> University of Girona, Girona, Spain

<sup>7</sup> IMIM (Hospital del Mar Medical Research Institute), Barcelona, Spain

† Equal contribution

†† joint last authorship

\* Corresponding author:

Cristina Villanueva

ISGlobal - Institut de Salut Global de Barcelona

PRBB – Barcelona Biomedical Research Park

Doctor Aiguader, 88

08003 Barcelona, Spain

Tel. +34 93 214 73 44

[cristina.villanueva@isglobal.org](mailto:cristina.villanueva@isglobal.org)

**Supplementary Table 1.** Frequency (%) and median concentrations (ng/L) based on individual chemical concentrations reported in the last 10 years assessing PFAS concentrations in Spain and the Barcelona metropolitan area <sup>1,2</sup>

|                | <b>Llorca <i>et al.</i> (2012) (N= 17)</b> |        |                       |        | <b>Schwanz <i>et al.</i> (2016) (N= 29)</b> |        |                       |      | <b>This study (N=42)</b> |        |                       |        |
|----------------|--------------------------------------------|--------|-----------------------|--------|---------------------------------------------|--------|-----------------------|------|--------------------------|--------|-----------------------|--------|
|                | <b>Spain 2011</b>                          |        | <b>Barcelona 2011</b> |        | <b>Spain 2014</b>                           |        | <b>Barcelona 2014</b> |      | <b>Barcelona 2020</b>    |        | <b>Barcelona 2021</b> |        |
|                | %                                          | Median | %                     | Median | %                                           | Median | %                     | Mean | %                        | Median | %                     | Median |
| <b>PFBA</b>    | 56                                         | 10     | 56                    | 9.8    | n.a.                                        | n.a.   | n.a.                  | n.a. | n.d.                     | n.d.   | n.d.                  | n.d.   |
| <b>PFPeA</b>   | 41                                         | 1.7    | 33                    | 2.4    | n.a.                                        | n.a.   | n.a.                  | n.a. | 64                       | 3.3    | 62                    | 4.0    |
| <b>PFHxA</b>   | 19                                         | 3.0    | 11                    | 3.0    | 6.9                                         | 36     | 18                    | 36   | 31                       | 13     | n.d.                  | n.d.   |
| <b>PFHpA</b>   | 14                                         | 11     | 11                    | 1.6    | 35                                          | 15     | 55                    | 3.5  | 52                       | 3.0    | 24                    | 1.6    |
| <b>PFOA</b>    | 39                                         | 2.9    | 78                    | 4.6    | 21                                          | 13     | 36                    | 13.5 | 12                       | 11     | n.d.                  | n.d.   |
| <b>PFNA</b>    | 34                                         | 0.8    | 44                    | 0.4    | 17                                          | 14     | 9.1                   | 8.7  | n.d.                     | n.d.   | n.d.                  | n.d.   |
| <b>PFDA</b>    | 8.9                                        | 2.3    | n.d.                  | n.d.   | 6.9                                         | 18     | 9.1                   | 11.6 | 2.4                      | 6.0    | 2.4                   | 4.4    |
| <b>PFUdA</b>   | 6.3                                        | 1.1    | n.d.                  | n.d.   | 3.5                                         | 7.7    | 9.1                   | 7.7  | 2.4                      | 7.2    | n.d.                  | n.d.   |
| <b>PFDoA</b>   | 1.3                                        | 2.1    | n.d.                  | n.d.   | 3.5                                         | 12     | n.d.                  | n.d. | 4.8                      | 25 *   | n.d.                  | n.d.   |
| <b>PFTTrDA</b> | n.d.                                       | n.d.   | n.d.                  | n.d.   | n.d.                                        | n.d.   | n.d.                  | n.d. | n.d.                     | n.d.   | n.d.                  | n.d.   |
| <b>PFBS</b>    | 37                                         | 2.4    | 44                    | 8.3    | 31                                          | 11     | 55                    | 10.5 | 64                       | 9.2    | 45                    | 6.8    |
| <b>PFHxS</b>   | 38                                         | 0.4    | 22                    | 0.5    | n.d.                                        | n.d.   | n.d.                  | n.d. | n.d.                     | n.d.   | 2.4                   | 22 *   |
| <b>PFOS</b>    | 54                                         | 7.0    | 67                    | 13     | 38                                          | 41     | 55                    | 43   | 52                       | 12.5   | 4.8                   | 11.5   |
| <b>PFDS</b>    | n.d.                                       | n.d.   | n.d.                  | n.d.   | n.d.                                        | n.d.   | n.d.                  | n.d. | n.d.                     | n.d.   | n.d.                  | n.d.   |
| <b>FOSA</b>    | 10                                         | 2.0    | n.d.                  | n.d.   | n.d.                                        | n.d.   | n.d.                  | n.d. | n.d.                     | n.d.   | n.d.                  | n.d.   |
| <b>PFTeA</b>   | 5.1                                        | 4.1    | n.d.                  | n.d.   | 3.5                                         | 18     | 9.1                   | 18.4 | n.a.                     | n.a.   | n.a.                  | n.a.   |
| <b>PFHxDA</b>  | n.d.                                       | n.d.   | n.d.                  | n.d.   | 3.5                                         | 2.6    | n.d.                  | n.d. | n.a.                     | n.a.   | n.a.                  | n.a.   |
| <b>PFODA</b>   | n.d.                                       | n.d.   | n.d.                  | n.d.   | n.d.                                        | n.d.   | n.d.                  | n.d. | n.a.                     | n.a.   | n.a.                  | n.a.   |
| <b>PFHxPA</b>  | n.d.                                       | n.d.   | n.d.                  | n.d.   | n.a.                                        | n.a.   | n.a.                  | n.a. | n.a.                     | n.a.   | n.a.                  | n.a.   |
| <b>PFOPA</b>   | 6.3                                        | 4.5    | 33                    | 4.5    | n.a.                                        | n.a.   | n.a.                  | n.a. | n.a.                     | n.a.   | n.a.                  | n.a.   |
| <b>PFDPA</b>   | 6.3                                        | 11     | 22                    | 8.4    | n.a.                                        | n.a.   | n.a.                  | n.a. | n.a.                     | n.a.   | n.a.                  | n.a.   |

\* It should be noted that this analyte was only detected in two samples.

n.d.: not detected; n.a.: not analysed

**Supplementary Table 2.** List of organic compounds included in the non-target screening of drinking water of the first sampling (August-October 2020)

|    | Name                                     | Class of compound           | Formula                                                         |
|----|------------------------------------------|-----------------------------|-----------------------------------------------------------------|
| 1  | Acetaminophen                            | Pharmaceutical              | C <sub>8</sub> H <sub>9</sub> NO <sub>2</sub>                   |
| 2  | Acridone                                 | Pharmaceutical              | C <sub>13</sub> H <sub>9</sub> NO                               |
| 3  | Albendazol                               | Pharmaceutical              | C <sub>12</sub> H <sub>15</sub> N <sub>3</sub> O <sub>2</sub> S |
| 4  | Alprazolam                               | Pharmaceutical              | C <sub>17</sub> H <sub>13</sub> ClN <sub>4</sub>                |
| 5  | Amlodipine                               | Pharmaceutical              | C <sub>20</sub> H <sub>25</sub> ClN <sub>2</sub> O <sub>5</sub> |
| 6  | Atenolol                                 | Pharmaceutical              | C <sub>14</sub> H <sub>22</sub> N <sub>2</sub> O <sub>3</sub>   |
| 7  | Atorvastatin                             | Pharmaceutical              | C <sub>33</sub> H <sub>35</sub> FN <sub>2</sub> O <sub>5</sub>  |
| 8  | Azaperol                                 | Pharmaceutical              | C <sub>19</sub> H <sub>24</sub> FN <sub>3</sub> O               |
| 9  | Azaperone                                | Pharmaceutical              | C <sub>19</sub> H <sub>22</sub> FN <sub>3</sub> O               |
| 10 | Azithromycin                             | Pharmaceutical              | C <sub>38</sub> H <sub>72</sub> N <sub>2</sub> O <sub>12</sub>  |
| 11 | Bezafibrate                              | Pharmaceutical              | C <sub>19</sub> H <sub>20</sub> ClNO <sub>4</sub>               |
| 12 | Carazolol                                | Pharmaceutical              | C <sub>18</sub> H <sub>22</sub> N <sub>2</sub> O <sub>2</sub>   |
| 13 | Carbamazepine                            | Pharmaceutical              | C <sub>15</sub> H <sub>12</sub> N <sub>2</sub> O                |
| 14 | 10,11-epoxide carbamazepine              | Pharmaceutical (metabolite) | C <sub>15</sub> H <sub>12</sub> N <sub>2</sub> O <sub>2</sub>   |
| 15 | Cefalexin                                | Pharmaceutical              | C <sub>16</sub> H <sub>17</sub> N <sub>3</sub> O <sub>4</sub> S |
| 16 | Cimetidine                               | Pharmaceutical              | C <sub>10</sub> H <sub>16</sub> N <sub>6</sub> S                |
| 17 | Ciprofloxacin                            | Pharmaceutical              | C <sub>17</sub> H <sub>18</sub> FN <sub>3</sub> O <sub>3</sub>  |
| 18 | Citalopram                               | Pharmaceutical              | C <sub>20</sub> H <sub>21</sub> N <sub>2</sub> FO               |
| 19 | Desmethycitalopram                       | Pharmaceutical (metabolite) | C <sub>19</sub> H <sub>19</sub> FN <sub>2</sub> O               |
| 20 | Clarithromycin                           | Pharmaceutical              | C <sub>38</sub> H <sub>69</sub> NO <sub>13</sub>                |
| 21 | Clopidogrel                              | Pharmaceutical              | C <sub>16</sub> H <sub>16</sub> ClNO <sub>2</sub> S             |
| 22 | Codeine                                  | Pharmaceutical              | C <sub>18</sub> H <sub>21</sub> NO <sub>3</sub>                 |
| 23 | Dihydrocodeine                           | Pharmaceutical (metabolite) | C <sub>18</sub> H <sub>23</sub> NO <sub>3</sub>                 |
| 24 | 6-acetylcodeine                          | Pharmaceutical (metabolite) | C <sub>20</sub> H <sub>23</sub> NO <sub>4</sub>                 |
| 25 | Desloratidine                            | Pharmaceutical              | C <sub>19</sub> H <sub>19</sub> ClN <sub>2</sub>                |
| 26 | Dexamethasone                            | Pharmaceutical              | C <sub>22</sub> H <sub>29</sub> FO <sub>5</sub>                 |
| 27 | 17-OXO-dexamethasone                     | Pharmaceutical (metabolite) | C <sub>20</sub> H <sub>25</sub> FO <sub>3</sub>                 |
| 28 | Dexamethasone acefurate                  | Pharmaceutical (metabolite) | C <sub>29</sub> H <sub>33</sub> FO <sub>8</sub>                 |
| 29 | Dexamethasone 21-(4-pyridinecarboxylate) | Pharmaceutical (metabolite) | C <sub>28</sub> H <sub>32</sub> FNO <sub>6</sub>                |
| 30 | Diazepam                                 | Pharmaceutical              | C <sub>16</sub> H <sub>13</sub> ClN <sub>2</sub> O              |
| 31 | Diazepam <i>N</i> -oxide                 | Pharmaceutical (metabolite) | C <sub>16</sub> H <sub>13</sub> ClN <sub>2</sub> O <sub>2</sub> |
| 32 | Diclofenac                               | Pharmaceutical              | C <sub>14</sub> H <sub>11</sub> Cl <sub>2</sub> NO <sub>2</sub> |
| 33 | Diltiazem                                | Pharmaceutical              | C <sub>22</sub> H <sub>26</sub> N <sub>2</sub> O <sub>4</sub> S |

|    |                                  |                             |                                                                               |
|----|----------------------------------|-----------------------------|-------------------------------------------------------------------------------|
| 34 | <i>N</i> -Desmethyldiltiazem     | Pharmaceutical (metabolite) | C <sub>21</sub> H <sub>24</sub> N <sub>2</sub> O <sub>4</sub> S               |
| 35 | Dimetridazole                    | Pharmaceutical              | C <sub>5</sub> H <sub>7</sub> N <sub>3</sub> O <sub>2</sub>                   |
| 36 | Enalapril                        | Pharmaceutical              | C <sub>20</sub> H <sub>28</sub> N <sub>2</sub> O <sub>5</sub>                 |
| 37 | Enalaprilat                      | Pharmaceutical              | C <sub>18</sub> H <sub>24</sub> N <sub>2</sub> O <sub>5</sub>                 |
| 38 | Erythromycin                     | Pharmaceutical              | C <sub>37</sub> H <sub>67</sub> NO <sub>13</sub>                              |
| 39 | Famotidine                       | Pharmaceutical              | C <sub>8</sub> H <sub>15</sub> N <sub>7</sub> O <sub>2</sub> S <sub>3</sub>   |
| 40 | Famotidine propanamide           | Pharmaceutical (metabolite) | C <sub>8</sub> H <sub>13</sub> N <sub>5</sub> OS <sub>2</sub>                 |
| 41 | Famotidine sulfamoyl propanamide | Pharmaceutical (metabolite) | C <sub>8</sub> H <sub>14</sub> N <sub>6</sub> O <sub>3</sub> S <sub>3</sub>   |
| 42 | Fluoxetine                       | Pharmaceutical              | C <sub>17</sub> H <sub>18</sub> F <sub>3</sub> NO                             |
| 43 | Fluvastatin                      | Pharmaceutical              | C <sub>24</sub> H <sub>26</sub> FNO <sub>4</sub>                              |
| 44 | Furosemide                       | Pharmaceutical              | C <sub>12</sub> H <sub>11</sub> ClN <sub>2</sub> O <sub>5</sub> S             |
| 45 | Gemfibrozil                      | Pharmaceutical              | C <sub>15</sub> H <sub>22</sub> O <sub>3</sub>                                |
| 46 | Glibenclamide                    | Pharmaceutical              | C <sub>23</sub> H <sub>28</sub> ClN <sub>3</sub> O <sub>5</sub> S             |
| 47 | Hydrochlorothiazide              | Pharmaceutical              | C <sub>7</sub> H <sub>8</sub> ClN <sub>3</sub> O <sub>4</sub> S <sub>2</sub>  |
| 48 | Hydrocodone                      | Pharmaceutical              | C <sub>18</sub> H <sub>21</sub> NO <sub>3</sub>                               |
| 49 | Ibuprofen                        | Pharmaceutical              | C <sub>13</sub> H <sub>18</sub> O <sub>2</sub>                                |
| 50 | Indomethacine                    | Pharmaceutical              | C <sub>19</sub> H <sub>16</sub> ClNO <sub>4</sub>                             |
| 51 | Iopromide                        | Pharmaceutical              | C <sub>18</sub> H <sub>24</sub> I <sub>3</sub> N <sub>3</sub> O <sub>8</sub>  |
| 52 | Irbesartan                       | Pharmaceutical              | C <sub>25</sub> H <sub>28</sub> N <sub>6</sub> O                              |
| 53 | Ketoprofen                       | Pharmaceutical              | C <sub>16</sub> H <sub>14</sub> O <sub>3</sub>                                |
| 54 | Piketoprofen                     | Pharmaceutical              | C <sub>22</sub> H <sub>20</sub> N <sub>2</sub> O <sub>2</sub>                 |
| 55 | Levamisol                        | Pharmaceutical              | C <sub>11</sub> H <sub>12</sub> N <sub>2</sub> S                              |
| 56 | Loratidine                       | Pharmaceutical              | C <sub>22</sub> H <sub>23</sub> ClN <sub>2</sub> O <sub>2</sub>               |
| 57 | Lorazepam                        | Pharmaceutical              | C <sub>15</sub> H <sub>10</sub> Cl <sub>2</sub> N <sub>2</sub> O <sub>2</sub> |
| 58 | Losartan                         | Pharmaceutical              | C <sub>22</sub> H <sub>23</sub> ClN <sub>6</sub> O                            |
| 59 | Meloxicam                        | Pharmaceutical              | C <sub>14</sub> H <sub>13</sub> N <sub>3</sub> O <sub>4</sub> S <sub>2</sub>  |
| 60 | Metformin                        | Pharmaceutical              | C <sub>4</sub> H <sub>11</sub> N <sub>5</sub>                                 |
| 61 | Metoprolol                       | Pharmaceutical              | C <sub>15</sub> H <sub>25</sub> NO <sub>3</sub>                               |
| 62 | Metronidazole                    | Pharmaceutical              | C <sub>6</sub> H <sub>9</sub> N <sub>3</sub> O <sub>3</sub>                   |
| 63 | Metronidazole-Oh                 | Pharmaceutical              | C <sub>6</sub> H <sub>9</sub> N <sub>3</sub> O <sub>3</sub>                   |
| 64 | Nadolol                          | Pharmaceutical              | C <sub>17</sub> H <sub>27</sub> NO <sub>4</sub>                               |
| 65 | Naproxen                         | Pharmaceutical              | C <sub>14</sub> H <sub>14</sub> O <sub>3</sub>                                |
| 66 | Norfluoxetine                    | Pharmaceutical              | C <sub>16</sub> H <sub>16</sub> F <sub>3</sub> NO                             |
| 67 | Ofloxacin                        | Pharmaceutical              | C <sub>18</sub> H <sub>20</sub> FN <sub>3</sub> O <sub>4</sub>                |
| 68 | Olanzapine                       | Pharmaceutical              | C <sub>17</sub> H <sub>20</sub> N <sub>4</sub> S                              |
| 69 | Oxycodone                        | Pharmaceutical              | C <sub>18</sub> H <sub>21</sub> NO <sub>4</sub>                               |

|     |                                  |                               |                                                                              |
|-----|----------------------------------|-------------------------------|------------------------------------------------------------------------------|
| 70  | Noroxycodone                     | Pharmaceutical (metabolite)   | C <sub>17</sub> H <sub>19</sub> NO <sub>4</sub>                              |
| 71  | Paroxetine                       | Pharmaceutical                | C <sub>19</sub> H <sub>20</sub> FNO <sub>3</sub>                             |
| 72  | Phenazone                        | Pharmaceutical                | C <sub>11</sub> H <sub>12</sub> N <sub>2</sub> O                             |
| 73  | Piroxicam                        | Pharmaceutical                | C <sub>15</sub> H <sub>13</sub> N <sub>3</sub> O <sub>4</sub> S              |
| 74  | Piroxicam pivalic ester          | Pharmaceutical                | C <sub>20</sub> H <sub>21</sub> N <sub>3</sub> O <sub>5</sub> S              |
| 75  | Pravastatin                      | Pharmaceutical                | C <sub>23</sub> H <sub>36</sub> O <sub>7</sub>                               |
| 76  | Propranolol                      | Pharmaceutical                | C <sub>16</sub> H <sub>21</sub> NO <sub>2</sub>                              |
| 77  | Propyphenazone                   | Pharmaceutical                | C <sub>14</sub> H <sub>18</sub> N <sub>2</sub> O                             |
| 78  | Ranitidine                       | Pharmaceutical                | C <sub>13</sub> H <sub>22</sub> N <sub>4</sub> O <sub>3</sub> S              |
| 79  | Ronidazole                       | Pharmaceutical                | C <sub>6</sub> H <sub>8</sub> N <sub>4</sub> O <sub>4</sub>                  |
| 80  | Salbutamol                       | Pharmaceutical                | C <sub>13</sub> H <sub>21</sub> NO <sub>3</sub>                              |
| 81  | Sertraline                       | Pharmaceutical                | C <sub>17</sub> H <sub>17</sub> Cl <sub>2</sub> N                            |
| 82  | Sotalol                          | Pharmaceutical                | C <sub>12</sub> H <sub>20</sub> N <sub>2</sub> O <sub>3</sub> S              |
| 83  | Sulfamethoxazole                 | Pharmaceutical                | C <sub>10</sub> H <sub>11</sub> N <sub>3</sub> O <sub>3</sub> S              |
| 84  | Tamsulosin                       | Pharmaceutical                | C <sub>20</sub> H <sub>28</sub> N <sub>2</sub> O <sub>5</sub> S              |
| 85  | Tenoxicam                        | Pharmaceutical                | C <sub>13</sub> H <sub>11</sub> N <sub>3</sub> O <sub>4</sub> S <sub>2</sub> |
| 86  | Tetracycline                     | Pharmaceutical                | C <sub>22</sub> H <sub>24</sub> N <sub>2</sub> O <sub>8</sub>                |
| 87  | 5a,11a-dehydrochlorotetracycline | Pharmaceutical (metabolite)   | C <sub>22</sub> H <sub>21</sub> ClN <sub>2</sub> O <sub>8</sub>              |
| 88  | 4-aminoanhydrochlorotetracycline | Pharmaceutical (metabolite)   | C <sub>20</sub> H <sub>17</sub> ClN <sub>2</sub> O <sub>7</sub>              |
| 89  | Torasemide                       | Pharmaceutical                | C <sub>16</sub> H <sub>20</sub> N <sub>4</sub> O <sub>3</sub> S              |
| 90  | Trazodone                        | Pharmaceutical                | C <sub>19</sub> H <sub>22</sub> ClN <sub>5</sub> O                           |
| 91  | Trimethoprim                     | Pharmaceutical                | C <sub>14</sub> H <sub>18</sub> N <sub>4</sub> O <sub>3</sub>                |
| 92  | Desmethoxy-4-ethoxy-trimethprim  | Pharmaceutical (metabolite)   | C <sub>15</sub> H <sub>20</sub> N <sub>4</sub> O <sub>3</sub>                |
| 93  | Valsartan                        | Pharmaceutical                | C <sub>24</sub> H <sub>29</sub> N <sub>5</sub> O <sub>3</sub>                |
| 94  | Venlafaxine                      | Pharmaceutical                | C <sub>17</sub> H <sub>27</sub> NO <sub>2</sub>                              |
| 95  | Desvenlafaxine                   | Pharmaceutical (metabolite)   | C <sub>16</sub> H <sub>25</sub> NO <sub>2</sub>                              |
| 96  | Warfarin                         | Pharmaceutical                | C <sub>19</sub> H <sub>16</sub> O <sub>4</sub>                               |
| 97  | Xylazine                         | Pharmaceutical                | C <sub>12</sub> H <sub>16</sub> N <sub>2</sub> S                             |
| 98  | Estradiol 17-glucuronide         | Hormone/Endocrine disruptor   | C <sub>24</sub> H <sub>32</sub> O <sub>8</sub>                               |
| 99  | Estradiole diacetate             | Hormone / Endocrine disruptor | C <sub>22</sub> H <sub>28</sub> O <sub>4</sub>                               |
| 100 | Dibromoestradiol                 | Hormone / Endocrine disruptor | C <sub>18</sub> H <sub>22</sub> Br <sub>2</sub> O <sub>2</sub>               |
| 101 | Estriol                          | Hormone / Endocrine disruptor | C <sub>18</sub> H <sub>24</sub> O <sub>3</sub>                               |
| 102 | Oxoestriol                       | Hormone / Endocrine disruptor | C <sub>18</sub> H <sub>22</sub> O <sub>4</sub>                               |
| 103 | Nilestriol                       | Hormone / Endocrine disruptor | C <sub>20</sub> H <sub>24</sub> O <sub>3</sub>                               |
| 104 | Ethinylestriol                   | Hormone / Endocrine disruptor | C <sub>20</sub> H <sub>24</sub> O <sub>3</sub>                               |
| 105 | Estriol 16-glucuronide           | Hormone / Endocrine disruptor | C <sub>24</sub> H <sub>32</sub> O <sub>9</sub>                               |

|     |                                                 |                               |                                                               |
|-----|-------------------------------------------------|-------------------------------|---------------------------------------------------------------|
| 106 | Estriol 3-sulfate                               | Hormone / Endocrine disruptor | C <sub>18</sub> H <sub>24</sub> O <sub>6</sub> S              |
| 107 | Estriol succinate                               | Hormone / Endocrine disruptor | C <sub>26</sub> H <sub>32</sub> O <sub>9</sub>                |
| 108 | Estriol tripropionate                           | Hormone / Endocrine disruptor | C <sub>27</sub> H <sub>36</sub> O <sub>6</sub>                |
| 109 | Estrone                                         | Hormone / Endocrine disruptor | C <sub>18</sub> H <sub>22</sub> O <sub>2</sub>                |
| 110 | 2-methoxyestrone 3-glucosiduronic acid          | Hormone / Endocrine disruptor | C <sub>25</sub> H <sub>32</sub> O <sub>9</sub>                |
| 111 | 2-methoxyestrone                                | Hormone / Endocrine disruptor | C <sub>19</sub> H <sub>24</sub> O <sub>3</sub>                |
| 112 | 3- <i>O</i> -(Carboxymethyl)estrone             | Hormone / Endocrine disruptor | C <sub>20</sub> H <sub>24</sub> O <sub>4</sub>                |
| 113 | Estrone quinone                                 | Hormone / Endocrine disruptor | C <sub>18</sub> H <sub>20</sub> O <sub>3</sub>                |
| 114 | 16 $\alpha$ -hydroxyestrone                     | Hormone / Endocrine disruptor | C <sub>18</sub> H <sub>22</sub> O <sub>3</sub>                |
| 115 | Estradiol                                       | Hormone / Endocrine disruptor | C <sub>18</sub> H <sub>24</sub> O <sub>2</sub>                |
| 116 | Estrone 3-glucuronide                           | Hormone / Endocrine disruptor | C <sub>24</sub> H <sub>30</sub> O <sub>8</sub>                |
| 117 | Estrone 3-sulfate                               | Hormone / Endocrine disruptor | C <sub>18</sub> H <sub>22</sub> O <sub>5</sub> S              |
| 118 | Ethinyl estradiol                               | Hormone / Endocrine disruptor | C <sub>20</sub> H <sub>24</sub> O <sub>2</sub>                |
| 119 | Diethylstilbestrol                              | Hormone / Endocrine disruptor | C <sub>18</sub> H <sub>20</sub> O <sub>2</sub>                |
| 120 | Caffeine                                        | Stimulants                    | C <sub>8</sub> H <sub>10</sub> N <sub>4</sub> O <sub>2</sub>  |
| 121 | Cocaine                                         | Illicit drug / pharmaceutical | C <sub>17</sub> H <sub>21</sub> NO <sub>4</sub>               |
| 122 | Benzoylcegonine                                 | Illicit drug (metabolite)     | C <sub>16</sub> H <sub>19</sub> NO <sub>4</sub>               |
| 123 | Ecgonine-methyl-ester                           | Illicit drug (metabolite)     | C <sub>10</sub> H <sub>17</sub> NO <sub>3</sub>               |
| 124 | Cocaethylene                                    | Illicit drug (metabolite)     | C <sub>18</sub> H <sub>23</sub> NO <sub>4</sub>               |
| 125 | 4'-Fluorococaine                                | Illicit drug / pharmaceutical | C <sub>17</sub> H <sub>20</sub> FNO <sub>4</sub>              |
| 126 | Benzoylcegonine                                 | Illicit drug (metabolite)     | C <sub>16</sub> H <sub>19</sub> NO <sub>4</sub>               |
| 127 | LSD (lysergic acid diethylamide)                | Illicit drug / pharmaceutical | C <sub>20</sub> H <sub>25</sub> N <sub>3</sub> O              |
| 128 | Lysergic acid                                   | Illicit drug / pharmaceutical | C <sub>16</sub> H <sub>16</sub> N <sub>2</sub> O <sub>2</sub> |
| 129 | 1-acetyllysergic acid diethylamide              | Illicit drug                  | C <sub>22</sub> H <sub>27</sub> N <sub>3</sub> O <sub>2</sub> |
| 130 | Cannabidiol                                     | Illicit drug / pharmaceutical | C <sub>21</sub> H <sub>30</sub> O <sub>2</sub>                |
| 131 | CBGA (cannabigerolic acid)                      | Illicit drug / pharmaceutical | C <sub>22</sub> H <sub>32</sub> O <sub>4</sub>                |
| 132 | Ephedrine                                       | Illicit drug / pharmaceutical | C <sub>10</sub> H <sub>15</sub> NO                            |
| 133 | <i>N</i> -methylephedrine                       | Illicit drug derivative       | C <sub>11</sub> H <sub>17</sub> NO                            |
| 134 | 4-hydroxyephedrine                              | Illicit drug (metabolite)     | C <sub>10</sub> H <sub>15</sub> NO <sub>2</sub>               |
| 135 | Mephedrone                                      | Illicit drug                  | C <sub>11</sub> H <sub>15</sub> NO <sub>2</sub> S             |
| 136 | Methamphetamine                                 | Illicit drug / pharmaceutical | C <sub>10</sub> H <sub>15</sub> N                             |
| 137 | Methylenedioxy- <i>N,N</i> -dimethylamphetamine | Illicit drug                  | C <sub>12</sub> H <sub>17</sub> NO <sub>2</sub>               |
| 138 | Morphine                                        | Illicit drug / pharmaceutical | C <sub>17</sub> H <sub>19</sub> NO <sub>3</sub>               |
| 139 | Dibutylmorphine                                 | Illicit drug                  | C <sub>25</sub> H <sub>31</sub> NO <sub>5</sub>               |
| 140 | EDDP                                            | Illicit drug (metabolite)     | C <sub>20</sub> H <sub>23</sub> NO <sub>4</sub>               |
| 141 | Nicotine                                        | Stimulant                     | C <sub>10</sub> H <sub>14</sub> N <sub>2</sub>                |

|     |                            |                        |                                                                               |
|-----|----------------------------|------------------------|-------------------------------------------------------------------------------|
| 142 | 3-Hydroxycarbofuran        | Pesticide              | C <sub>12</sub> H <sub>15</sub> NO <sub>4</sub>                               |
| 143 | Acethochlor                | Pesticide              | C <sub>14</sub> H <sub>20</sub> ClNO <sub>2</sub>                             |
| 144 | Alachlor                   | Pesticide              | C <sub>14</sub> H <sub>20</sub> ClNO <sub>2</sub>                             |
| 145 | Atrazine                   | Pesticide              | C <sub>8</sub> H <sub>14</sub> ClN <sub>5</sub>                               |
| 146 | Deisopropylatrazine        | Pesticide (metabolite) | C <sub>5</sub> H <sub>8</sub> ClN <sub>5</sub>                                |
| 147 | Desethylatrazine           | Pesticide (metabolite) | C <sub>6</sub> H <sub>10</sub> ClN <sub>5</sub>                               |
| 148 | Desethylhydroxyatrazine    | Pesticide (metabolite) | C <sub>6</sub> H <sub>11</sub> N <sub>5</sub> O                               |
| 149 | Deethyldeisopropylatrazine | Pesticide (metabolite) | C <sub>3</sub> H <sub>8</sub> ClN <sub>5</sub>                                |
| 150 | Azinphos ethyl             | Pesticide              | C <sub>12</sub> H <sub>16</sub> N <sub>3</sub> O <sub>3</sub> PS <sub>2</sub> |
| 151 | Azinphos methyl            | Pesticide              | C <sub>10</sub> PN <sub>3</sub> H <sub>12</sub> S <sub>2</sub> O <sub>3</sub> |
| 152 | Burpofezin                 | Pesticide              | C <sub>16</sub> H <sub>23</sub> N <sub>3</sub> OS                             |
| 153 | Barbendazim                | Pesticide              | C <sub>9</sub> H <sub>9</sub> N <sub>3</sub> O <sub>2</sub>                   |
| 154 | Carbofuran                 | Pesticide              | C <sub>12</sub> H <sub>15</sub> NO <sub>3</sub>                               |
| 155 | Chlorfenvinphos            | Pesticide              | C <sub>12</sub> H <sub>14</sub> Cl <sub>3</sub> O <sub>4</sub> P              |
| 156 | Chlorpyriphos              | Pesticide              | C <sub>9</sub> H <sub>11</sub> Cl <sub>3</sub> NO <sub>3</sub> PS             |
| 157 | Diazinon                   | Pesticide              | C <sub>12</sub> H <sub>21</sub> N <sub>2</sub> O <sub>3</sub> PS              |
| 158 | Diclofenthion              | Pesticide              | C <sub>10</sub> H <sub>13</sub> Cl <sub>2</sub> O <sub>3</sub> PS             |
| 159 | Dimetoate                  | Pesticide              | C <sub>5</sub> H <sub>12</sub> NO <sub>3</sub> PS <sub>2</sub>                |
| 160 | Diuron                     | Pesticide              | C <sub>9</sub> H <sub>10</sub> Cl <sub>2</sub> N <sub>2</sub> O               |
| 161 | Ethion                     | Pesticide              | C <sub>9</sub> H <sub>22</sub> O <sub>4</sub> P <sub>2</sub> S <sub>4</sub>   |
| 162 | Fenitrothion               | Pesticide              | C <sub>9</sub> H <sub>12</sub> NO <sub>5</sub> PS                             |
| 163 | Fenoxon                    | Pesticide              | C <sub>10</sub> H <sub>15</sub> O <sub>4</sub> PS                             |
| 164 | Fenthion                   | Pesticide              | C <sub>10</sub> H <sub>15</sub> O <sub>3</sub> PS <sub>2</sub>                |
| 165 | Fenthion Sulfone           | Pesticide              | C <sub>10</sub> H <sub>15</sub> O <sub>5</sub> PS <sub>2</sub>                |
| 166 | Fenthion sulfoxide         | Pesticide              | C <sub>10</sub> H <sub>15</sub> O <sub>5</sub> PS                             |
| 167 | Hexythiazox                | Pesticide              | C <sub>17</sub> H <sub>21</sub> ClN <sub>2</sub> O <sub>2</sub> S             |
| 168 | Imazalil                   | Pesticide              | C <sub>14</sub> H <sub>14</sub> Cl <sub>2</sub> N <sub>2</sub> O              |
| 169 | Imidacloprid               | Pesticide              | C <sub>9</sub> H <sub>10</sub> ClN <sub>5</sub> O <sub>2</sub>                |
| 170 | Isoproturon                | Pesticide              | C <sub>12</sub> H <sub>18</sub> N <sub>2</sub> O                              |
| 171 | Isoproturon monodemethyl   | Pesticide (metabolite) | C <sub>11</sub> H <sub>16</sub> N <sub>2</sub> O                              |
| 172 | Isoproturon didemethyl     | Pesticide (metabolite) | C <sub>10</sub> H <sub>14</sub> N <sub>2</sub> O                              |
| 173 | Malathion                  | Pesticide              | C <sub>10</sub> H <sub>19</sub> O <sub>6</sub> PS <sub>2</sub>                |
| 174 | Methiocarb                 | Pesticide              | C <sub>11</sub> H <sub>15</sub> NO <sub>2</sub> S                             |
| 175 | Metoalachlor               | Pesticide              | C <sub>15</sub> H <sub>22</sub> ClNO <sub>2</sub>                             |
| 176 | Molinate                   | Pesticide              | C <sub>9</sub> H <sub>17</sub> NOS                                            |
| 177 | Omethoate                  | Pesticide              | C <sub>5</sub> H <sub>12</sub> NO <sub>4</sub> PS                             |

|     |                                      |                        |                                                                               |
|-----|--------------------------------------|------------------------|-------------------------------------------------------------------------------|
| 178 | Parathio <i>N</i> -ethyl             | Pesticide              | C <sub>10</sub> H <sub>14</sub> NO <sub>5</sub> PS                            |
| 179 | Parathio <i>N</i> -methyl            | Pesticide              | C <sub>8</sub> H <sub>10</sub> NO <sub>5</sub> PS                             |
| 180 | Prochloraz                           | Pesticide              | C <sub>15</sub> H <sub>16</sub> Cl <sub>3</sub> N <sub>3</sub> O <sub>2</sub> |
| 181 | Propanil                             | Pesticide              | C <sub>9</sub> H <sub>9</sub> Cl <sub>2</sub> NO                              |
| 182 | Propazine                            | Pesticide              | C <sub>9</sub> H <sub>16</sub> N <sub>5</sub> Cl                              |
| 183 | Propazine 2-hydroxy                  | Pesticide (metabolite) | C <sub>9</sub> H <sub>17</sub> N <sub>5</sub> O                               |
| 184 | Pyriproxyphen                        | Pesticide              | C <sub>20</sub> H <sub>19</sub> NO <sub>3</sub>                               |
| 185 | Simazine                             | Pesticide              | C <sub>7</sub> H <sub>12</sub> ClN <sub>5</sub>                               |
| 186 | Simazine 2-hydroxy                   | Pesticide (metabolite) | C <sub>7</sub> H <sub>13</sub> ClN <sub>5</sub> O                             |
| 187 | Tebuconazole                         | Pesticide              | C <sub>16</sub> H <sub>22</sub> ClN <sub>3</sub> O                            |
| 188 | Terbumeton                           | Pesticide              | C <sub>10</sub> H <sub>19</sub> N <sub>5</sub> O                              |
| 189 | Terbumeto <i>N</i> -Desethyl         | Pesticide              | C <sub>8</sub> H <sub>15</sub> N <sub>5</sub> O                               |
| 190 | Terbuthylazine                       | Pesticide              | C <sub>9</sub> H <sub>16</sub> ClN <sub>5</sub>                               |
| 191 | Terbuthylazine desethyl              | Pesticide (metabolite) | C <sub>7</sub> H <sub>12</sub> ClN <sub>5</sub>                               |
| 192 | Terbuthylazine-2 Hidroxy             | Pesticide              | C <sub>9</sub> H <sub>17</sub> N <sub>5</sub> O                               |
| 193 | Terbuthylazine-desethyl-2-hydroxy    | Pesticide (metabolite) | C <sub>7</sub> H <sub>13</sub> N <sub>5</sub> O                               |
| 194 | Terbutryn                            | Pesticide              | C <sub>10</sub> H <sub>19</sub> N <sub>5</sub> S                              |
| 195 | Thiabendazole                        | Pesticide              | C <sub>10</sub> H <sub>7</sub> N <sub>3</sub> S                               |
| 196 | Tolclophos-methyl                    | Pesticide              | C <sub>9</sub> H <sub>11</sub> Cl <sub>2</sub> O <sub>3</sub> PS              |
| 197 | 1H-Benzotriazole                     | Industrial organic     | C <sub>6</sub> H <sub>5</sub> N <sub>3</sub>                                  |
| 198 | 1-Chlorobenzotriazole                | Industrial organic     | C <sub>6</sub> H <sub>4</sub> ClN <sub>3</sub>                                |
| 199 | Tolytriazol                          | Industrial organic     | C <sub>7</sub> H <sub>7</sub> N <sub>3</sub>                                  |
| 200 | Nonylphenol monoethoxylate           | Industrial organic     | C <sub>17</sub> H <sub>28</sub> O <sub>2</sub>                                |
| 201 | Octylphenol                          | Industrial organic     | C <sub>14</sub> H <sub>22</sub> O                                             |
| 202 | Octylphenol diethoxylate             | Industrial organic     | C <sub>18</sub> H <sub>30</sub> O <sub>3</sub>                                |
| 203 | Octylphenol monocarboxylate          | Industrial organic     | C <sub>16</sub> H <sub>24</sub> O <sub>3</sub>                                |
| 204 | Octylphenol monoethoxylate           | Industrial organic     | C <sub>16</sub> H <sub>26</sub> O <sub>2</sub>                                |
| 205 | Tris(2-chloroethyl) phosphate        | Industrial organic     | C <sub>6</sub> H <sub>12</sub> Cl <sub>3</sub> O <sub>4</sub> P               |
| 206 | Tris(1,3-dichloro-2-propyl)phosphate | Industrial organic     | C <sub>9</sub> H <sub>15</sub> Cl <sub>6</sub> O <sub>4</sub> P               |
| 207 | Tris(2,3-dibromopropyl) phosphate    | Industrial organic     | C <sub>9</sub> H <sub>15</sub> Br <sub>6</sub> O <sub>4</sub> P               |
| 208 | Tris(butoxyethyl) phosphate          | Industrial organic     | C <sub>18</sub> H <sub>39</sub> O <sub>7</sub> P                              |
| 209 | Tris(chloroisopropyl) phosphate      | Industrial organic     | C <sub>9</sub> H <sub>18</sub> Cl <sub>3</sub> O <sub>4</sub> P               |
| 210 | Bisphenol A (BPA)                    | Industrial organic     | C <sub>15</sub> H <sub>16</sub> O <sub>2</sub>                                |
| 211 | Nonylphenol (NP)                     | Industrial organic     | C <sub>15</sub> H <sub>24</sub> O                                             |
| 212 | Nonylphenol diethoxylate             | Industrial organic     | C <sub>19</sub> H <sub>32</sub> O <sub>3</sub>                                |

|     |                                  |                             |                                                                                |
|-----|----------------------------------|-----------------------------|--------------------------------------------------------------------------------|
| 213 | Nonylphenol monocarboxylate      | Industrial organic          | C <sub>17</sub> H <sub>26</sub> O <sub>3</sub>                                 |
| 214 | 4-Methylbenzylidene camphor      | Personal care product       | C <sub>18</sub> H <sub>22</sub> O                                              |
| 215 | Benzophenone-3                   | Personal care product       | C <sub>14</sub> H <sub>12</sub> O <sub>3</sub>                                 |
| 216 | Ethylhexyl methoxycinnamate      | Personal care product       | C <sub>18</sub> H <sub>26</sub> O <sub>3</sub>                                 |
| 217 | Octocrylene                      | Personal care product       | C <sub>24</sub> H <sub>27</sub> NO <sub>2</sub>                                |
| 218 | methoxybenzophenone              | Personal care product       | C <sub>14</sub> H <sub>12</sub> O <sub>2</sub>                                 |
| 219 | 4,4'-Dihydroxybenzophenone       | Personal care product       | C <sub>13</sub> H <sub>10</sub> O <sub>3</sub>                                 |
| 220 | 4-Hydroxybenzophenone            | Personal care product       | C <sub>13</sub> H <sub>10</sub> O <sub>2</sub>                                 |
| 221 | Benzophenone-1 (benzoresorcinol) | Personal care product       | C <sub>13</sub> H <sub>10</sub> O <sub>3</sub>                                 |
| 222 | Benzophenone-2 (DJ1892000)       | Personal care product       | C <sub>13</sub> H <sub>10</sub> O <sub>5</sub>                                 |
| 223 | Ethyl 4-aminobenzoate            | Personal care product       | C <sub>9</sub> H <sub>11</sub> NO <sub>2</sub>                                 |
| 224 | Ethylhexyl dimethyl PABA         | Personal care product       | C <sub>17</sub> H <sub>27</sub> NO <sub>2</sub>                                |
| 225 | Ethylparaben                     | Personal care product       | C <sub>9</sub> H <sub>10</sub> O <sub>3</sub>                                  |
| 226 | Methylparaben                    | Personal care product       | C <sub>8</sub> H <sub>8</sub> O <sub>3</sub>                                   |
| 227 | Benzylparaben                    | Personal care product       | C <sub>14</sub> H <sub>12</sub> O <sub>3</sub>                                 |
| 228 | Propylparaben                    | Personal care product       | C <sub>10</sub> H <sub>12</sub> O <sub>3</sub>                                 |
| 229 | Triclorocaraban                  | Personal care product       | C <sub>13</sub> H <sub>9</sub> Cl <sub>3</sub> N <sub>2</sub> O                |
| 230 | Triclosan                        | Personal care product       | C <sub>12</sub> H <sub>7</sub> Cl <sub>3</sub> O <sub>2</sub>                  |
| 231 | Mefenamic acid                   | Pharmaceutical              | C <sub>15</sub> H <sub>15</sub> NO <sub>2</sub>                                |
| 232 | Clofibric acid                   | Pharmaceutical (metabolite) | C <sub>10</sub> H <sub>11</sub> O <sub>3</sub> Cl                              |
| 233 | Mevastatin                       | Pharmaceutical              | C <sub>25</sub> H <sub>38</sub> O <sub>5</sub>                                 |
| 234 | Lansoprazole                     | Pharmaceutical              | C <sub>16</sub> H <sub>14</sub> F <sub>3</sub> N <sub>3</sub> O <sub>2</sub> S |
| 235 | Loratadine                       | Pharmaceutical              | C <sub>22</sub> H <sub>23</sub> ClN <sub>2</sub> O <sub>2</sub>                |
| 236 | Erythromycin                     | Pharmaceutical              | C <sub>37</sub> H <sub>67</sub> NO <sub>13</sub>                               |
| 237 | Azythromycin                     | Pharmaceutical              | C <sub>38</sub> H <sub>72</sub> N <sub>2</sub> O <sub>12</sub>                 |
| 238 | Propranolol                      | Pharmaceutical              | C <sub>16</sub> H <sub>21</sub> NO <sub>2</sub>                                |
| 239 | Ketamine                         | Pharmaceutical              | C <sub>13</sub> H <sub>16</sub> ClNO                                           |
| 240 | Hydroxynorketamine               | Pharmaceutical (metabolite) | C <sub>12</sub> H <sub>14</sub> ClNO <sub>2</sub>                              |
| 241 | Fentanyl                         | Illicit drug                | C <sub>22</sub> H <sub>28</sub> N <sub>2</sub> O                               |
| 242 | Benzylfentanyl                   | Illicit drug                | C <sub>21</sub> H <sub>26</sub> N <sub>2</sub> O                               |
| 243 | Acetylfentanyl                   | Illicit drug                | C <sub>21</sub> H <sub>26</sub> N <sub>2</sub> O                               |
| 244 | Norfentanyl                      | Illicit drug                | C <sub>14</sub> H <sub>20</sub> N <sub>2</sub> O                               |
| 245 | 4-Methoxybutyrfentanyl           | Illicit drug                | C <sub>24</sub> H <sub>32</sub> N <sub>2</sub> O <sub>2</sub>                  |
| 246 | Sucralose                        | Sweetener                   | C <sub>12</sub> H <sub>19</sub> Cl <sub>3</sub> O <sub>8</sub>                 |
| 247 | Azelaic acid                     | Personal care product       | C <sub>9</sub> H <sub>16</sub> O <sub>4</sub>                                  |
| 248 | Suberic acid                     | Personal care product       | C <sub>8</sub> H <sub>14</sub> O <sub>4</sub>                                  |

**Supplementary Table 3.** Limits of quantification (LOQ) in drinking water (DW), limits of detection (LOD) in urine, and internal standards for target compounds

| <b>Per- and polyfluoroalkyl substances</b>                                       | <b>DW LOQ (ng/L)</b> | <b>Urine LOD (pg/mL)</b> | <b>Internal Standard</b> |
|----------------------------------------------------------------------------------|----------------------|--------------------------|--------------------------|
| <b>Perfluoroalkyl carboxylates (PFCA)</b>                                        |                      |                          |                          |
| Perfluorobutanoate, PFBA (C4)                                                    | 50                   | 5.0                      | 13C4-PFBA                |
| Perfluoropentanoate, PFPeA (C5)                                                  | 1.0                  | 2.0                      | 13C5-PFPeA               |
| Perfluorohexanoate, PFHxA (C6)                                                   | 10                   | 0.8                      | 13C5-PFHxA               |
| Perfluoroheptanoate, PFHpA (C7)                                                  | 1.0                  | 1.7                      | 13C4-PFHpA               |
| Perfluorooctanoate, PFOA (C8)                                                    | 10                   | 1.8                      | 13C8-PFOA                |
| Perfluorononanoate, PFNA (C9)                                                    | 5.0                  | 1.4                      | 13C9-PFNA                |
| Perfluorodecanoate, PFDA (C10)                                                   | 5.0                  | 0.3                      | 13C6-PFDA                |
| Perfluoroundecanoate, PFUdA (C11)                                                | 5.0                  | 0.3                      | 13C7-PFUdA               |
| Perfluorododecanoate, PFDoA (C12)                                                | 10                   | 0.4                      | 13C2-PFDoA               |
| Perfluorotridecanoate, PFTrDA (C13)                                              | 50                   | 1.0                      | 13C2-PFDoA               |
| <b>Perfluoroalkyl sulfonates (PFSA)</b>                                          |                      |                          |                          |
| Perfluorobutane sulfonate, PFBS (C4)                                             | 5.0                  | 0.2                      | 13C3-PFBS                |
| Perfluoropentane sulfonate, PFPeS (C5)                                           | 10                   | 0.6                      | 13C3-PFHxS               |
| Perfluorohexane sulfonate, PFHxS (C6)                                            | 10                   | 0.02                     | 13C3-PFHxS               |
| Perfluoroheptane sulfonate, PFHpS (C7)                                           | 5.0                  | 0.04                     | 13C8-PFOS                |
| Perfluorooctane sulfonate, PFOS (C8)                                             | 10                   | 0.02                     | 13C8-PFOS                |
| Perfluorononane sulfonate, PFNS (C9)                                             | 10                   | 0.6                      | 13C8-PFOS                |
| Perfluorodecane sulfonate, PFDS (C10)                                            | 10                   | 0.6                      | 13C8-PFOS                |
| Perfluorodecane sulfonate, PFUdS (C11)                                           | 10                   | 0.6                      | 13C8-PFOS                |
| Perfluoroundecane sulfonate, PFDoS (C12)                                         | 10                   | 0.6                      | 13C8-PFOS                |
| Perfluorotridecane sulfonate, PFTrDS (C13)                                       | 10                   | 0.6                      | 13C8-PFOS                |
| <b>Perfluorooctane sulfonamides</b>                                              |                      |                          |                          |
| PFOSA                                                                            | 50                   | 0.33                     | 13C8-PFOSA               |
| N-MePFOSA                                                                        | 50                   | 1.0                      | 13C8-PFOSA               |
| N-EtPFOSA                                                                        | 50                   | 1.0                      | 13C8-PFOSA               |
| <b>Fluorotelomer sulfonates (FTS)</b>                                            |                      |                          |                          |
| 4:2 FTS                                                                          | 10                   | 0.1                      | 13C2-4:2 FTS             |
| 6:2 FTS                                                                          | 10                   | 0.01                     | 13C2-6:2 FTS             |
| 8:2 FTS                                                                          | 10                   | 0.01                     | 13C2-8:2 FTS             |
| 10:2 FTS                                                                         | 50                   | 0.01                     | 13C2-8:2 FTS             |
| <b>Fluoroalkylether compounds (ether-PFAS)</b>                                   |                      |                          |                          |
| 2,3,3,3-Tetrafluoro-2-(1,1,2,2,3,3,3-heptafluoropropoxy)-propanoic acid, HFPO-DA | 10                   | 0.4                      | 13C3-HFPO-DA             |
| Perfluoro-4-oxapentanoic acid, PF4OPeA                                           | 10                   | 1.3                      | 13C3-HFPO-DA             |
| Perfluoro-5-oxahexanoic acid, PF5OHxA                                            | 5.0                  | 7.5                      | 13C3-HFPO-DA             |
| Perfluoro-3,6-dioxaheptanoic acid, 3,6-OPFHpA                                    | 5.0                  | 1.7                      | 13C3-HFPO-DA             |
| Sodium dodecafluoro-3H-4,8-dioxanonanoate, NaDONA                                | 1.0                  | 0.7                      | 13C3-HFPO-DA             |
| Potassium 9-chlorohexadecafluoro-3-oxanonane-1-sulfonate, 9Cl-PF3ONS             | 10                   | 0.01                     | 13C3-HFPO-DA             |
| Potassium 11-chloroeicosafluoro-3-oxaundecane-1-sulfonate, 11 Cl-PF3OUdS         | 10                   | 0.01                     | 13C3-HFPO-DA             |
| Potassium perfluoro (2-ethoxyethane) sulfonate, PFEESA                           | 50                   | 0.5                      | 13C3-HFPO-DA             |
| <b>Bisphenol A</b>                                                               | 10                   | -                        |                          |
| <b>Nonylphenol</b>                                                               | 10                   | -                        |                          |

Note: Isotope performance standards used in the urine analysis are  $^{13}\text{C}_3$ -PFBA,  $^{13}\text{C}_2$ -PFOA and  $^{13}\text{C}_4$ -PFOS:  $^{13}\text{C}_3$ -PFBA for PFBA;  $^{13}\text{C}_2$ -PFOA for every PFCA, HFPO-DA, PF4OPeA, PF5OHxA, 3,6-OPFHpA and NaDONA; and  $^{13}\text{C}_4$ -PFOS for all PFSAs, PFOSAs, FTSS, 9Cl-PF3ONS, 11 Cl-PF3OUdS and PFEESA, respectively.

The limit of quantification (LOQ) was considered the first level of the calibration curve. The limit of detection (LOD) was estimated as the concentration level that gives rise to a signal/noise ratio equal to three. No results were found in water samples with concentration levels  $<\text{LOQ}$  and  $>\text{LOD}$ , so we have considered the LOQ for water analysis. In contrast, for urine samples, the LOD has been taken as a reference.

## Supplementary Methods

**1) Reagents.** All reagents were of liquid chromatographic (LC) grade.

PFAS analysed were supplied by Wellington Laboratories Inc. (Guelph, Canada): EPA-533PAR native analyte primary mix of 500 pg/ $\mu$ L in methanol, EPA-533ES isotope dilution standard mix of 500 (2000) pg/ $\mu$ L in methanol, EPA-533IS isotope performance standard mix of 1000 (3000) pg/ $\mu$ L in methanol, sodium 1H,1H,2H,2H-perfluorododecane sulfonate (10:2 FTS) of 50 ng/ $\mu$ L in methanol, perfluoro-1-octane sulfonamide (PFOSA) of 50 ng/ $\mu$ L in isopropanol, N-ethylperfluoro-1-octane sulfonamide (N-Et-PFOSA) of 50 ng/ $\mu$ L in methanol, N-methylperfluoro-1-octane sulfonamide (N-Me-PFOSA) of 50 ng/ $\mu$ L in methanol and perfluoro-1-[ $^{13}\text{C}$ 8]octane sulfonamide (M8PFOSA) of 50 ng/ $\mu$ L in isopropanol. EPA-533PAR is a native mixture that contains: carboxylates (C4-C12); sulfonates (C4-C7 linear, C6 and C8 linear and branched isomers); n:2 FTS (n: 4, 6 and 8); HFPO-DA; PF4OPeA; PF5OHxA; 3,6-OPFHpA; NaDONA; 9Cl-PF3ONS; 11Cl-PF3OUdS; and, PFEESA. EPA 533ES is a isotope dilution standards mix containing  $^{13}\text{C}$ 4-PFBA,  $^{13}\text{C}$ 5-PFPeA,  $^{13}\text{C}$ 5-PFHxA,  $^{13}\text{C}$ 4-PFHpA,  $^{13}\text{C}$ 8-PFOA,  $^{13}\text{C}$ 9-PFNA,  $^{13}\text{C}$ 6-PFDA,  $^{13}\text{C}$ 7-PFUdA,  $^{13}\text{C}$ 2-PFDoA,  $^{13}\text{C}$ 3-PFBS,  $^{13}\text{C}$ 3-PFHxS,  $^{13}\text{C}$ 8-PFOS,  $^{13}\text{C}$ 2-4:2 FTS,  $^{13}\text{C}$ 2-6:2 FTS,  $^{13}\text{C}$ 2-8:2 FTS and  $^{13}\text{C}$ 3-HFPO-DA. EPA-533IS is an isotope performance standard mix including  $^{13}\text{C}$ 3-PFBA,  $^{13}\text{C}$ 2-PFOA and  $^{13}\text{C}$ 4-PFOS. Intermediate and calibration solutions were prepared weekly from the stock standard solution by appropriate dilution in methanol or acetonitrile and stored at -20 °C. Nitrogen (99.999% pure) and high-purity argon (Ar1) supplied by Air Liquide (Madrid, Spain) was used for the electrospray ionization (ESI) source and as a collision-induced dissociation (CID) gas in the TSQ Quantum triple quadrupole, respectively.

Nonylphenol solid, d8-NP of 100 ng/ $\mu$ L in acetone and d14-BPA 100 ng/ $\mu$ L in acetonitrile were acquired from Dr. Ehrenstorfer (LGC Standards, Teddington, UK). d5-NP of 100 ng/ $\mu$ L

in acetone was purchased at A2S Analytical Standard Solutions (Saint Jean d'Illac, France), and bisphenol A of 100 ng/ $\mu$ L in methanol was acquired at Neochema GmbH (Bodenheim, Germany). For GC–MS analysis, helium (He2) obtained by Air Liquide (Madrid, Spain) was employed as carrier gas.

**2) Quality control.** Quality control (blank spikes) and blank samples were extracted with every batch of sample. For water methodology, the compound recoveries range between 75 - 119% for all PFAS, with a median value of 85% and RSDs below 19% for reproducibility. On the other hand, for urine methodology, the compound recoveries range between 54 - 107% for all PFAS, with a median value of 76% and RSDs below 15% for reproducibility, with more favourable recoveries for PFAS with low-intermediate alkyl chain length (C4-C9). Two MRM transitions by LC–MS/MS or two ions by GC–MS were monitored for each compound included in the analyses, except for PFBA and PFPeA, one for quantification and one for confirmation according to the 2002/657/EC Commission Decision and relations between transitions or ions was calculated<sup>3</sup>. The fragmentation of PFBA and PFPeA yields a single fragment, respectively. Therefore, for these analytes, only one transition has been considered. Special care has been taken of identifying and quantifying PFBA and PFPeA, considering the retention time and peak shape of the respectively internal standard (13C4-PFBA and 13C5-PFPeA).

The quantification of PFAS, bisphenol A and nonylphenol was performed on the basis of the isotope dilution method, thus labelled internal standards have been added to each analysis.

The following criteria were used for identification purposes: a) the ratio of the chromatographic retention time of the analyte to that of the internal standard should correspond to that of the calibration solution at a tolerance of  $\pm 2.5\%$ ,  $\pm 0.4$  min,  $\pm 0.2$  min for LC–MS/MS, NP and BPA by GC–MS/MS analysis, respectively; b) two m/z signals were confirmed for each analyte; c) as proposed in 2002/657/EC Decision, the ratio between the

two signals in the sample compared to ratio in the calibration curve should be in agreement with calibration curve average  $\pm$  maximum permitted tolerances for relative ion intensities.

The quantification of all other analytes was performed by internal calibration curve: the plot ratio of the most intensive peak area divided with the internal standard area against the ratio of concentrations. Branched and linear PFOS were summed for quantitation purposes.

## Supplementary References

1. Llorca, M. *et al.* Analysis of perfluoroalkyl substances in waters from Germany and Spain. *Sci. Total Environ.* **431**, 139–150 (2012).
2. Schwanz, T. G., Llorca, M., Farré, M. & Barceló, D. Perfluoroalkyl substances assessment in drinking waters from Brazil, France and Spain. *Sci. Total Environ.* **539**, 143–152 (2016).
3. European Commission. *Comission decission of 12 August 2002 implementing Council Directive 96/23/EC concerning the performance of analytical methods and the interpretation of results (2002/657/EC)*. *Off. J. Eur. Comm.* (2002).
